# Supplementary material
Source: Springer Nature journal article supplement (https://www.springermedizin.de/resource/supplementary/12963_2012_208_MOESM3_ESM.pdf/9572388)

### MALES

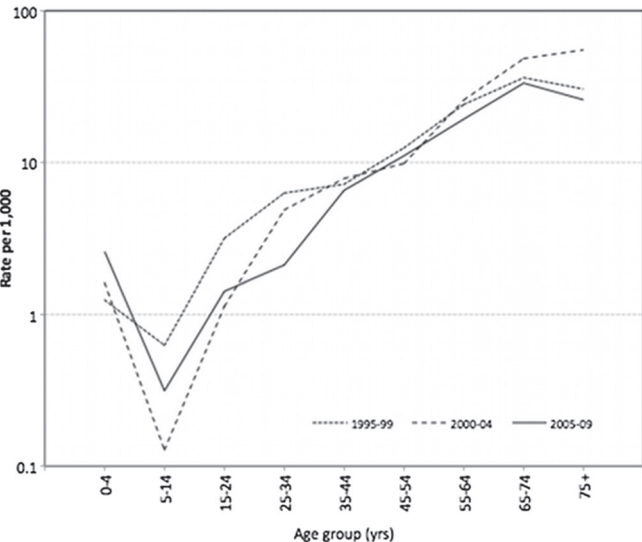

### FEMALES

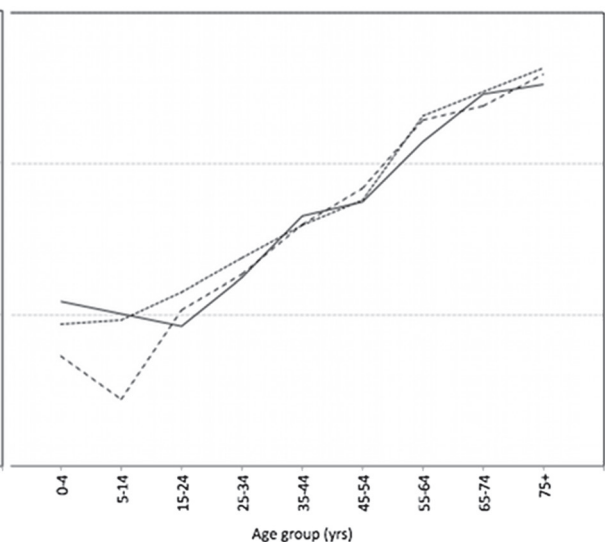

Supplement: MOESM3 [file 9572388]
